# Supplementary material for: Efficient Fluoride Wastewater Treatment Using Eco-Friendly Synthesized AlOOH
Source: MDPI journal article supplement (doi:10.3390/nano13212838), 2023-10-26
Supplement: s1 [file s1]

# Efficient Fluoride Wastewater Treatment Using Eco-Friendly Synthesized AlOOH

Wan-Tae Kim, Joo-Won Lee, Hong-Eun An, So-Hye Cho and Sohee Jeong \*

Materials Architecturing Research Center, Korea Institute of Science and Technology, Seoul 02792, Republic of Korea; wantaekim@kist.re.kr (W.-T.K.); lee2080@kist.re.kr (J.-W.L.); ahe9930@kist.re.kr (H.-E.A.); sohyec@kist.re.kr (S.-H.C.)

\* Correspondence: soheejeong@kist.re.kr; Tel.: +82-2-958-5369

## Supplementary Information

### Equation of pseudo first-order model and Langmuir isotherm model.

Equation 1 represents the pseudo-first-order kinetic equation, and Equation 2 represents the Langmuir isotherm equation.

$$q_t = q_e(1 - e^{-k_1 t}) \quad (1)$$

$$\frac{1}{q_e} = \frac{1}{C_e K_L q_m} + \frac{1}{q_m} \quad (2)$$

Where  $q_t$  is the amount of adsorbed fluoride ion at time  $t$ .  $k_1$  is the pseudo-first-order adsorption rate constant.  $C_e$  and  $q_e$  are the fluoride ion concentration and the adsorption capacity at equilibrium, respectively.  $q_m$  is the maximum adsorption capacity.  $K_L$  is Langmuir constant.

### FT-IR analysis of AlOOH-2, before and after fluoride ion removal.

Fluoride ion removal mechanism of AlOOH-2 was analyzed by FT-IR spectroscopy (Fig. S6). With comparison of intensity ratio of Al-O-H band at  $1063\text{ cm}^{-1}$  and Al-O band at  $594\text{ cm}^{-1}$ , their intensity ratio (Al-O-H/Al-O) were 0.99 and 0.81, before and after fluoride ion removal, respectively. After fluoride adsorption, it is found that the peak at  $1063\text{ cm}^{-1}$  compare to the peak at  $594\text{ cm}^{-1}$  corresponding to the surface hydroxyl groups decreases after fluoride adsorption, indicating that surface hydroxyl groups are involved in the fluoride adsorption process.

**Table S1.** Comparison of the costs of common Al salts and Al foil used as precursors for Al-based adsorbent synthesis.

| Precursor                    | Price (USD/kg)* |
|------------------------------|-----------------|
| Aluminum chloride            | 116.00          |
| Aluminum isopropoxide        | 76.50           |
| Aluminum nitrate nonahydrate | 194.00          |
| Household Al foil            | 2.10            |

\* Prices are compared based on the listings provided by Alibaba.com (Alibaba Group Holding Ltd.) for aluminum foil, and Sigma-Aldrich Inc. for the other precursors.

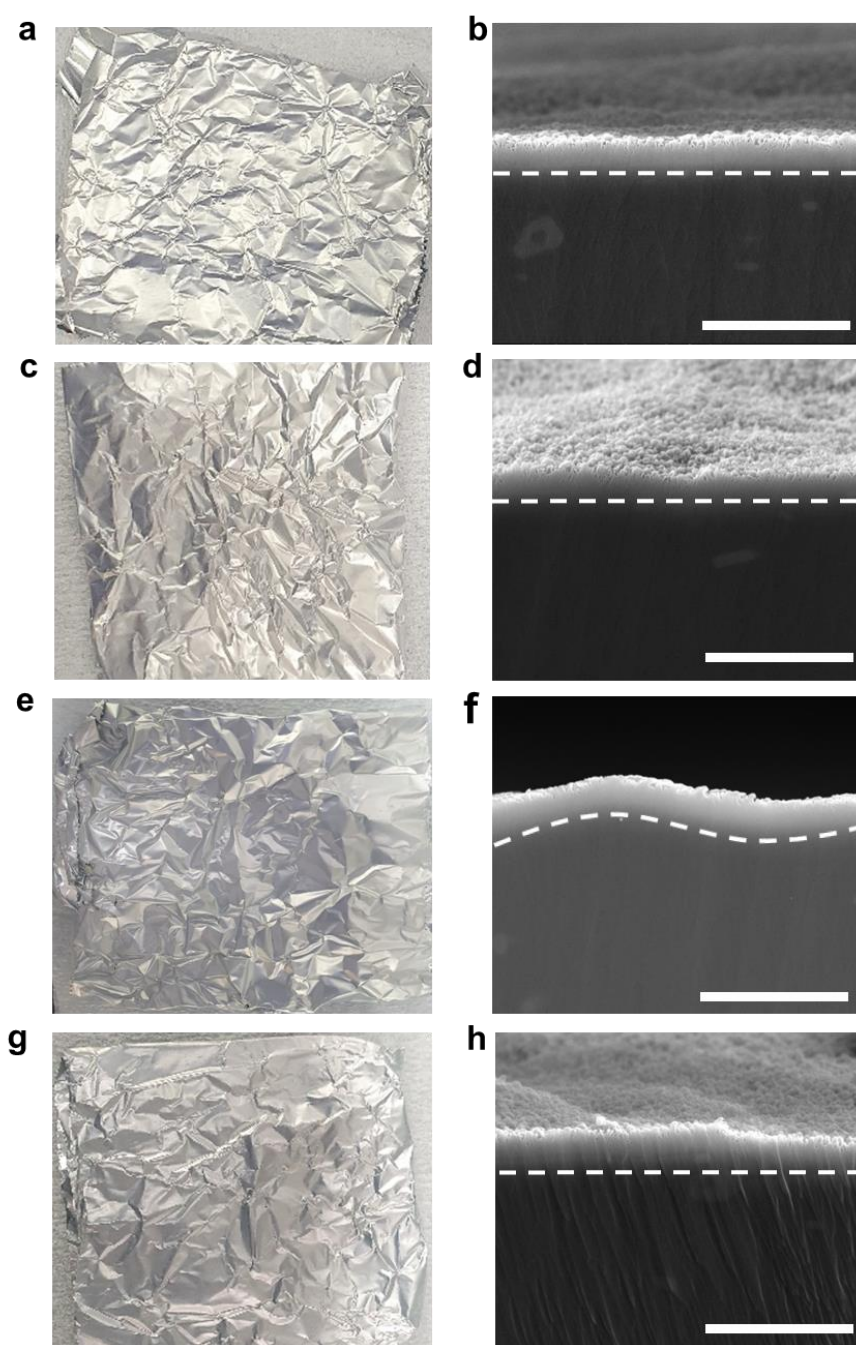

**Figure S1.** (a, c, e, g) Photographs and (b, d, f, h) cross-sectional view FE-SEM images of AlOOH on Al foil which were fabricated by immersing Al foil in boiling DI water with different immersing time. (a, b : 0.5 h, c, d: 1.0 h, e, f: 2.0h and g, h: 4.0h, white scale bar is 3  $\mu\text{m}$ )).

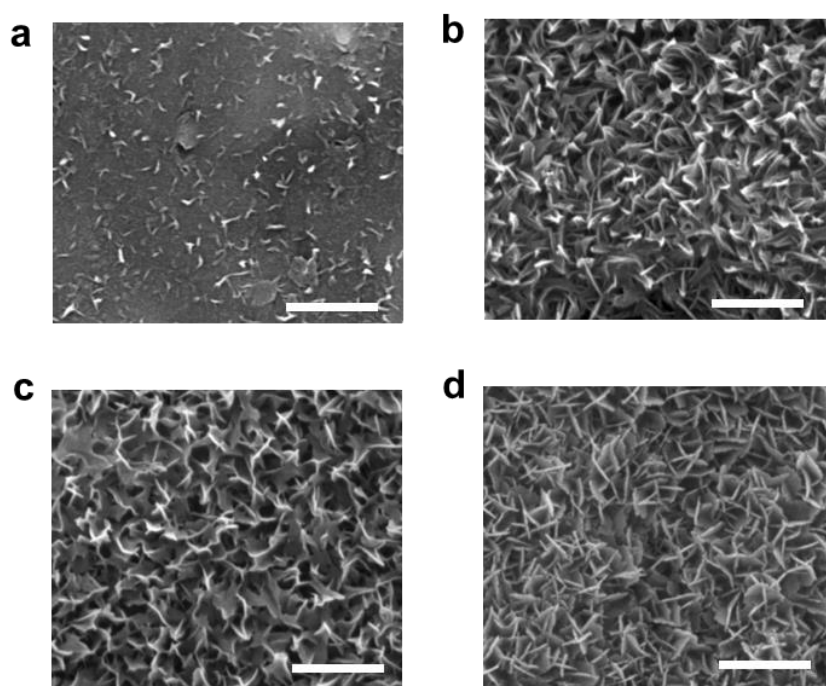

**Figure S2.** FE-SEM images of AlOOH on Al foil, synthesized by immersing in boiling DI water for (a) 10 sec, (b) 30 sec, (c) 1 min, (d) 5min (refer to AlOOH-10s, AlOOH-30s, AlOOH-1m, AlOOH-5m, white scale bar is 500 nm).

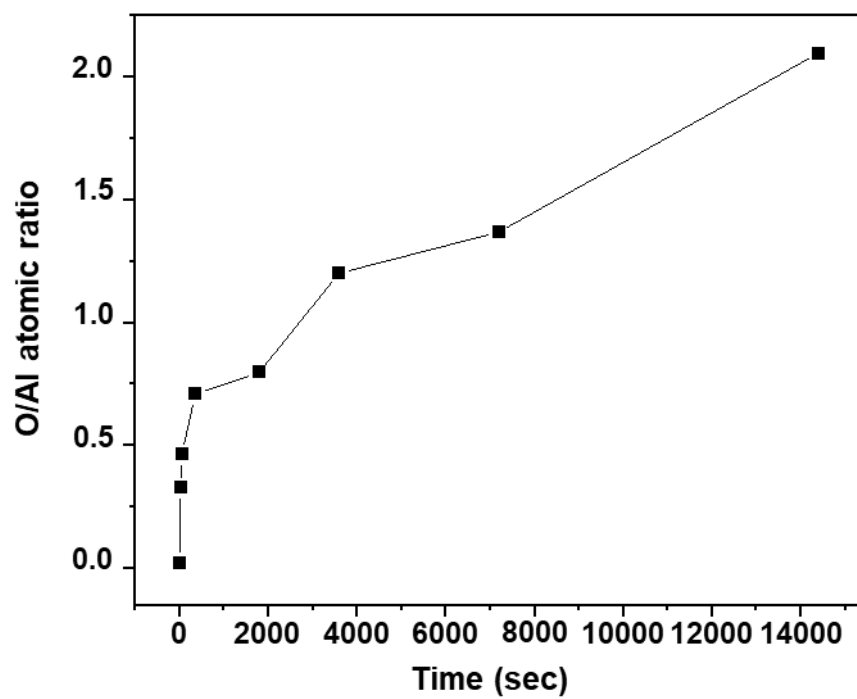

**Figure S3.** Atomic ratio of Al and O of AlOOH on Al foil with different immersing time in boiling DI water, from EDS analysis.

**Table S2.** Atomic percent of Al and O of AlOOH on Al foil with different immersing time in boiling DI water by EDS analysis.

| Immersing<br>time<br><br>Atoms (at %) | 10 sec | 30 sec | 1 min | 5 min | 0.5 h | 1.0 h | 2.0 h | 4.0 h |
|---------------------------------------|--------|--------|-------|-------|-------|-------|-------|-------|
|                                       |        |        |       |       |       |       |       |       |
| O                                     | 2.14   | 24.61  | 31.63 | 41.45 | 44.28 | 54.53 | 57.73 | 67.67 |
| Al                                    | 97.86  | 75.39  | 68.37 | 58.55 | 55.72 | 45.47 | 42.27 | 32.33 |

**Table S3.** Atomic percent of Al and O of AlOOH-0.5, AlOOH-1, AlOOH-2, and AlOOH-4 by spot EDS analysis from cross-sectional view.

| Sample<br>Atoms (at %) | AlOOH-0.5 | AlOOH-1 | AlOOH-2 | AlOOH-4 |
|------------------------|-----------|---------|---------|---------|
|                        |           |         |         |         |
| O                      | 65.55     | 65.40   | 66.27   | 66.39   |
| Al                     | 34.45     | 34.60   | 33.73   | 33.61   |

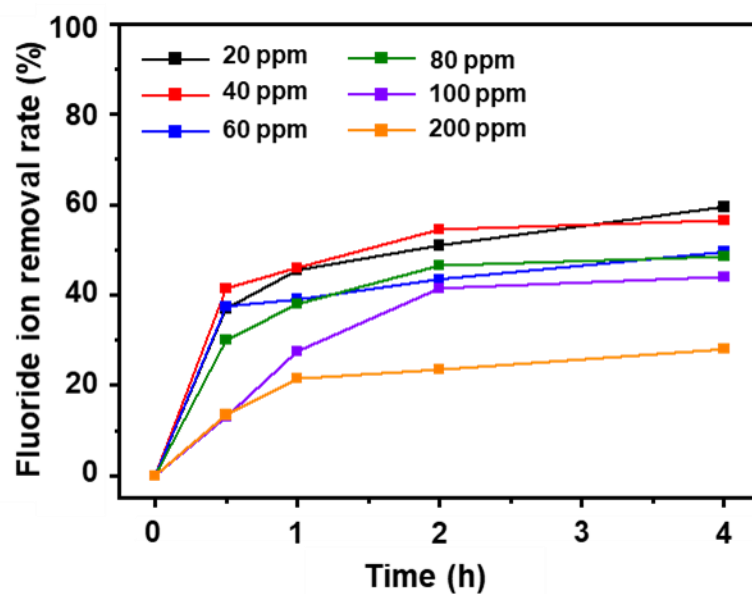

**Figure S4.** Fluoride ion removal rates of AlOOH-2 with different adsorption time and initial fluoride ion concentration (initial fluoride ion concentration: 20 ppm - 200 ppm, sample loading: 0.25 g, and adsorption time: 4.0 h).



**Table S4.** Kinetic model parameters of AlOOH-2 for pseudo first-order obtained from sorption experiments with different initial fluoride ion concentration.

| Initial concentration<br>(mg/L) | Pseudo first-order model |                |       |
|---------------------------------|--------------------------|----------------|-------|
|                                 | $q_e$<br>(mg/g)          | $k_1$<br>(1/h) | $R^2$ |
| 20                              | 0.28                     | 1.04           | 0.87  |
| 40                              | 0.54                     | 1.76           | 0.95  |
| 60                              | 0.68                     | 1.35           | 0.94  |
| 80                              | 0.96                     | 1.49           | 0.98  |
| 100                             | 1.18                     | 0.85           | 0.98  |
| 200                             | 1.35                     | 1.41           | 0.98  |

**Table S5.** Calculated parameters for Langmuir isotherm models obtained from equilibrium sorption experiments.

| Langmuir model |           |                |
|----------------|-----------|----------------|
| qm (mg/g)      | KL (L/mg) | R <sup>2</sup> |
| 1.98           | 0.02      | 0.99           |

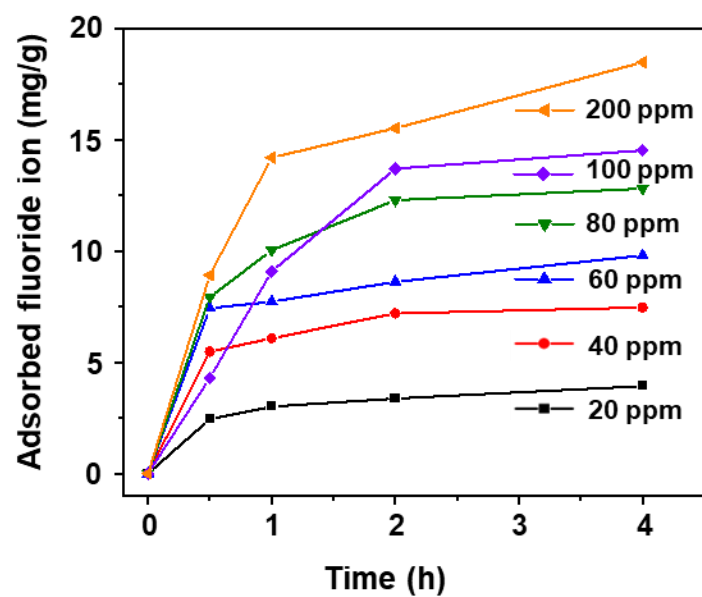

**Figure S5.** Adsorbed fluoride ion with different adsorption time and initial fluoride ion concentration by A IOOH-2 (This adsorbed fluoride ion value was calculated by the volume ratio calculated from the thickness for the AlOOH-only portion of the AlOOH on Al sample, initial fluoride ion concentration: 20 ppm - 200 ppm, sample loading: 0.25 g, and adsorption time: 4.0 h).

**Table S6.** Adsorption capacities of various Al-based adsorbents for fluoride ions.

| Adsorbents                                                            | Adsorption Capacity (mg/g) | references |
|-----------------------------------------------------------------------|----------------------------|------------|
| Al-modified magnetite ore                                             | 1.51                       | [50]       |
| Al/Fe oxide-loaded tea waste                                          | 18.52                      | [51]       |
| Al <sub>2</sub> O <sub>3</sub> -modified expanded graphite            | 5.75                       | [52]       |
| $\gamma$ -AlOOH@chitosan shell@Fe <sub>3</sub> O <sub>4</sub>         | 67.5                       | [53]       |
| mesoporous CoAl <sub>2</sub> O <sub>4</sub>                           | 14.8                       | [54]       |
| Al <sub>2</sub> O <sub>3</sub> nanoparticles                          | 9.73                       | [55]       |
| MgO-loaded Al <sub>2</sub> O <sub>3</sub>                             | 37.35                      | [56]       |
| bayerite/boehmite                                                     | 56.8                       | [57]       |
| amorphous AlOOH                                                       | 41.9                       | [3]        |
| Activated alumina                                                     | 16.34                      | [58]       |
| Hydrous-manganese oxide-coated alumina                                | 7.09                       | [59]       |
| Nano-AlOOH                                                            | 3.259                      | [22]       |
| Aluminium hydroxide impregnated macroporous polymeric resin adsorbent | 36.61                      | [45]       |
| Al-Zr loaded tea waste adsorbent                                      | 17.54                      | [46]       |
| AlOOH-2                                                               | 1.98<br>26.12*             | This study |

\* This value was calculated based on the volumetric ratio, calculated from the height of the AlOOH film in the sample.

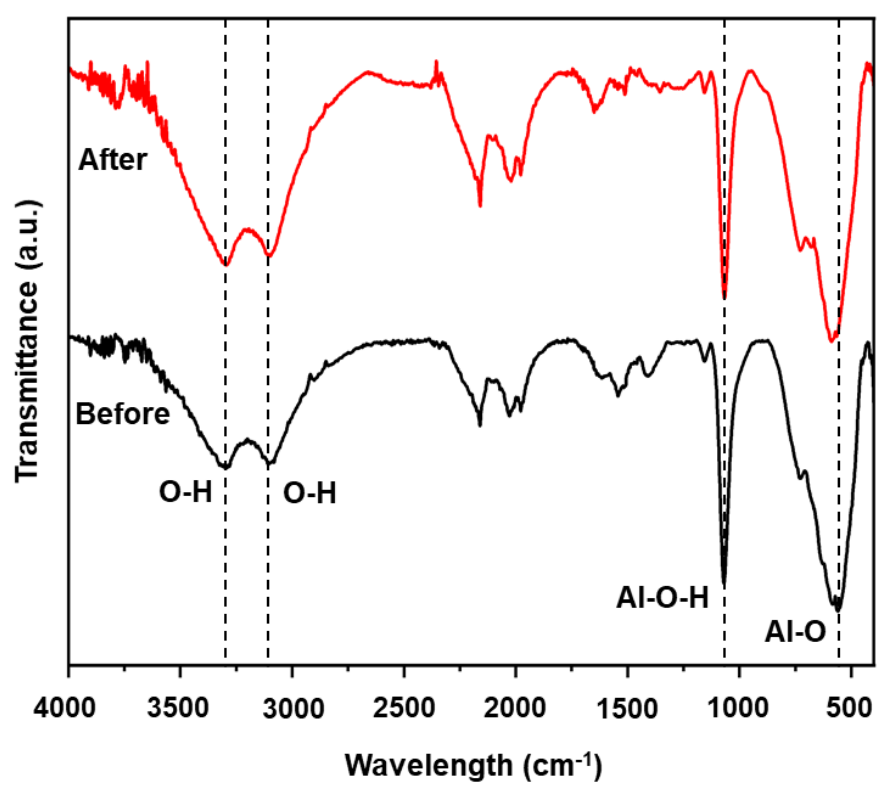

**Figure S6.** FT-IR spectra of AlOOH-2 (black: before fluoride ion removal, red: after fluoride ion removal).

**Table S7.** Concentrations of dissolved Al in the simulated wastewater with different pH conditions measured by inductively coupled plasma optical emission spectroscopy (ICP-OES) after removal of fluoride ion. (Relative weight percentage of the initial sample dosing amount)

| pH             | 4      | 5      | 7      | 9      | 11     |
|----------------|--------|--------|--------|--------|--------|
| Al Conc. (wt%) | 0.0191 | 0.0079 | 0.0002 | 0.0035 | 0.0115 |

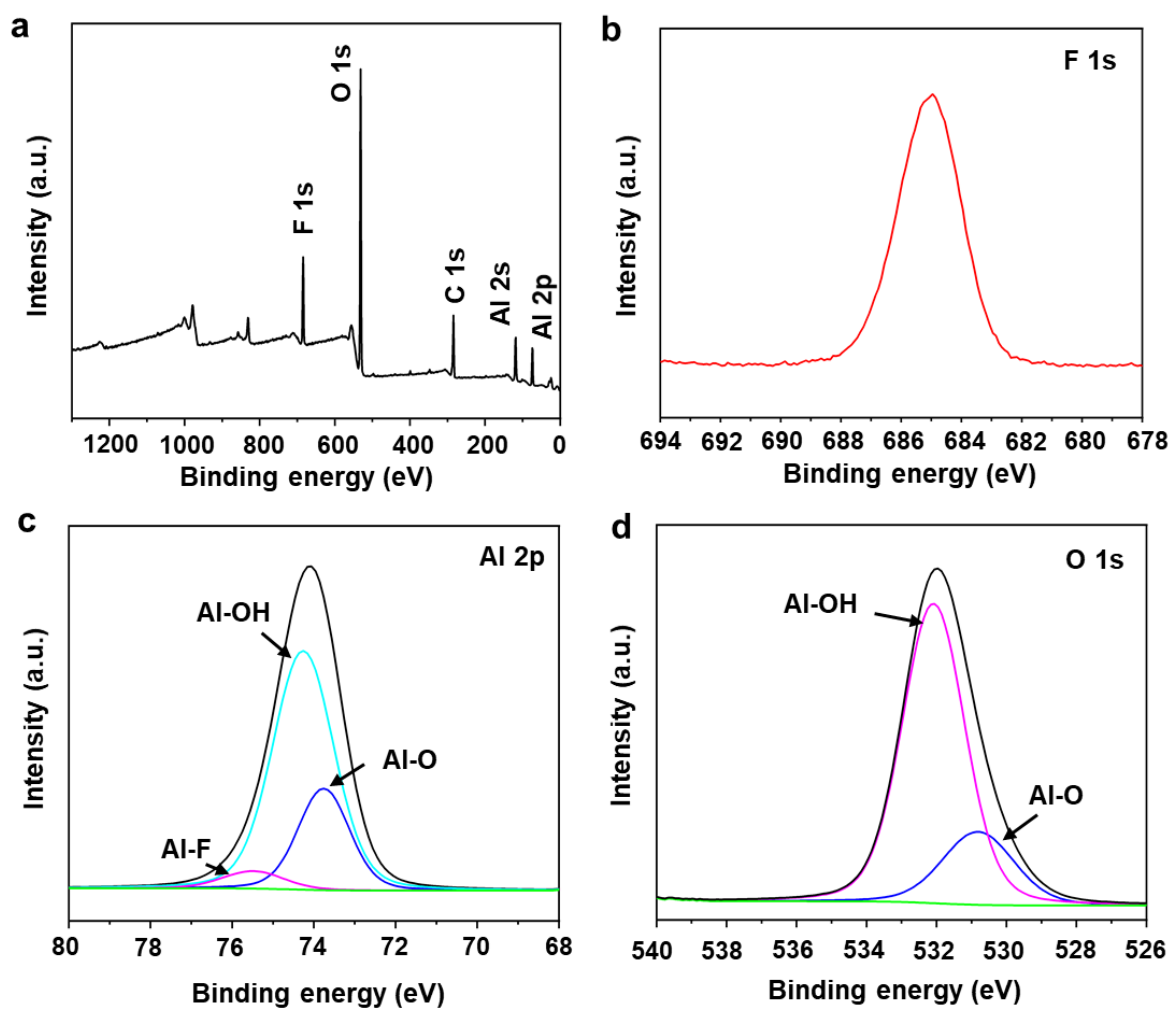

Figure S7. (a) XPS survey spectra and XPS spectra of (b) F 1s, (c) Al 2p and (d) O 1s of regenerated AlOOH-2.

**Table S8.** Al 2p and O 1s Peak Parameters for the regenerated AlOOH-2.

| Electrons | Peak    | Binding energy<br>(eV) | Concentration<br>(%) |
|-----------|---------|------------------------|----------------------|
| Al 2p     | Al-O    | 73.5                   | 24.98                |
|           | Al-OH   | 74.1                   | 69.89                |
|           | Al-F    | 75.3                   | 5.13                 |
| O 1s      | Al-O-Al | 530.6                  | 21.78                |
|           | Al-OH   | 532.0                  | 78.22                |
